# Supplementary material for: Fluorine-free electrolytes for all-solid sodium-ion batteries based on percyano-substituted organic salts
Source: PubMed Central journal article supplement (PMC5220368; doi:10.1038/srep40036), 2017-01-09
Supplement: srep40036-s1.pdf [file srep40036-s1.pdf]

Supplementary Material

**Fluorine-free electrolytes for all-solid sodium-ion batteries based on percyano-substituted organic salts**

Anna Bitner-Michalska, Gene M. Nolis, Grażyna Żukowska, Aldona Zalewska, Marcin Poterała, Tomasz Trzeciak, Maciej Dranka, Michał Kalita, Piotr Jankowski, Leszek Niedzicki, Janusz Zachara, Marek Marcinek, Władysław Wieczorek \*

Polymer Ionics Research Group

Faculty of Chemistry

Warsaw University of Technology

Noakowskiego 3, 00-664 Warsaw, Poland

## X-ray crystallography

A suitable single crystals of  $\text{Na}(\text{12C4})_2^+\text{PCPI}^-$ ,  $\text{Na}(\text{12C4})_2^+\text{TCP}^-$  and  $\text{Na}(\text{12C4})_2^+\text{TIM}^-$  solvates were selected under the polarizing microscope and mounted in inert oil on an Oxford Diffraction  $\kappa$ -CCD Gemini A Ultra diffractometer. Crystals were kept at 120.0(1) K during data collection. Cell refinement and data collection as well as data reduction and analysis were performed with the CRYSTALIS<sup>PRO</sup> software. [1] Using Olex2 [2], the structure was solved with the ShelXT [3] structure solution program using Direct Methods and refined with the ShelXL [4] refinement package using Least Squares minimization. The crystal data and experimental parameters are summarized in Table 3. Hydrogen atoms were added to the structure model at a geometrically idealized coordinates and refined as riding atoms. Solvate  $\text{Na}(\text{12C4})_2^+\text{PCPI}^-$  exhibit structural disorder. PCPI anions are disordered over two positions with occupancy ratios of 0.896(4):0.104(4). The non-merohedric crystal domains of  $\text{Na}(\text{12C4})_2^+\text{TCP}^-$  were found to be twinned in the triclinic space group  $P1$  with two domains of ratio 0.8498(4):0.1502(4) in the final refinement and the hklf 5 procedure was used for the refinement. Both orientation matrices identified using the program CRYSTALIS<sup>PRO</sup> are related by a twofold rotation around the  $[-0.2\ 0.08\ 0.02]$  direction in reciprocal space (0 1 0 in direct space).

**Supporting table 1.** Crystal Data for the Single Crystal X-ray Structures of 12C4 solvates of NaPCPI, NaTCP and NaTIM.

| Compound reference                          | $\text{Na}(\text{12C4})_2^+\text{PCPI}^-$                         | $\text{Na}(\text{12C4})_2^+\text{TCP}^-$                          | $\text{Na}(\text{12C4})_2^+\text{TIM}^-$                          |
|---------------------------------------------|-------------------------------------------------------------------|-------------------------------------------------------------------|-------------------------------------------------------------------|
| Chemical formula                            | $\text{C}_{16}\text{H}_{32}\text{NaO}_8\cdot\text{C}_8\text{N}_5$ | $\text{C}_{16}\text{H}_{32}\text{NaO}_8\cdot\text{C}_8\text{N}_5$ | $\text{C}_{16}\text{H}_{32}\text{NaO}_8\cdot\text{C}_6\text{N}_5$ |
| Formula Mass                                | 541.53                                                            | 541.53                                                            | 517.51                                                            |
| Crystal system                              | Triclinic                                                         | Triclinic                                                         | Monoclinic                                                        |
| $a/\text{\AA}$                              | 7.8139(2)                                                         | 14.8918(3)                                                        | 8.4422(2)                                                         |
| $b/\text{\AA}$                              | 13.9616(6)                                                        | 16.1844(3)                                                        | 13.7081(3)                                                        |
| $c/\text{\AA}$                              | 14.0604(6)                                                        | 23.6019(5)                                                        | 22.2632(5)                                                        |
| $\alpha/^\circ$                             | 119.144(5)                                                        | 88.8849(17)                                                       | 90                                                                |
| $\beta/^\circ$                              | 94.331(3)                                                         | 75.7581(19)                                                       | 94.506(2)                                                         |
| $\gamma/^\circ$                             | 94.794(3)                                                         | 78.8007(18)                                                       | 90                                                                |
| Unit cell volume/ $\text{\AA}^3$            | 1323.08(10)                                                       | 5406.2(2)                                                         | 2568.47(10)                                                       |
| Temperature/K                               | 120.0(1)                                                          | 120.0(1)                                                          | 120.0(1)                                                          |
| Space group                                 | $P1$                                                              | $P1$                                                              | $P2_1/n$                                                          |
| No. of formula units per unit cell, $Z$     | 2                                                                 | 8                                                                 | 4                                                                 |
| No. of reflections measured                 | 19779                                                             | 35861                                                             | 60234                                                             |
| No. of independent reflections              | 4681                                                              | 35861                                                             | 5487                                                              |
| $R_{int}$                                   | 0.0334                                                            | 0.0390                                                            | 0.0577                                                            |
| Final $R_I$ values ( $I > 2\sigma(I)$ )     | 0.0299                                                            | 0.0492                                                            | 0.0340                                                            |
| Final $wR(F^2)$ values ( $I > 2\sigma(I)$ ) | 0.0725                                                            | 0.1265                                                            | 0.0747                                                            |
| Final $R_I$ values (all data)               | 0.0381                                                            | 0.0746                                                            | 0.0471                                                            |
| Final $wR(F^2)$ values (all data)           | 0.0770                                                            | 0.1394                                                            | 0.0815                                                            |
| Goodness of fit on $F^2$                    | 1.026                                                             | 0.957                                                             | 1.035                                                             |
| CCDC number                                 | 1425674                                                           | 1425675                                                           | 1425676                                                           |

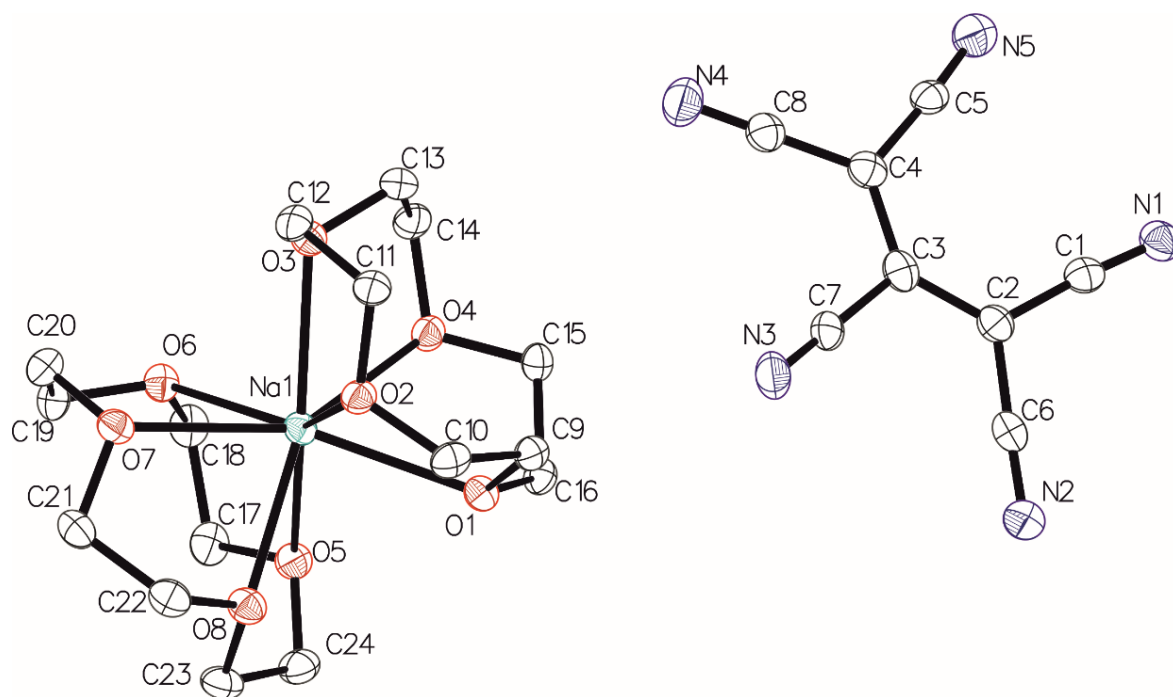

**Supporting figure 1.** Molecular structure of crystalline  $\text{Na}(\text{12C4})_2^+ \text{PCPI}^-$  solvate with atom numbering scheme. Hydrogen atoms and partial disorder of PCPI anion were omitted for clarity.

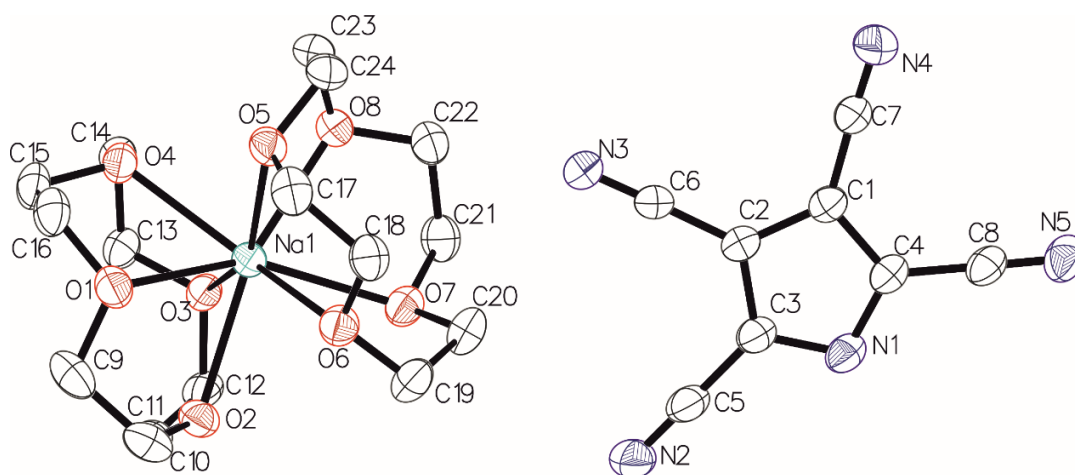

**Supporting figure 2.** Ortep plot of molecular assembly observed in  $\text{Na}(\text{12C4})_2^+ \text{TCP}^-$  solvate. Hydrogen atoms and disorder of 12C4 rings were omitted for clarity.

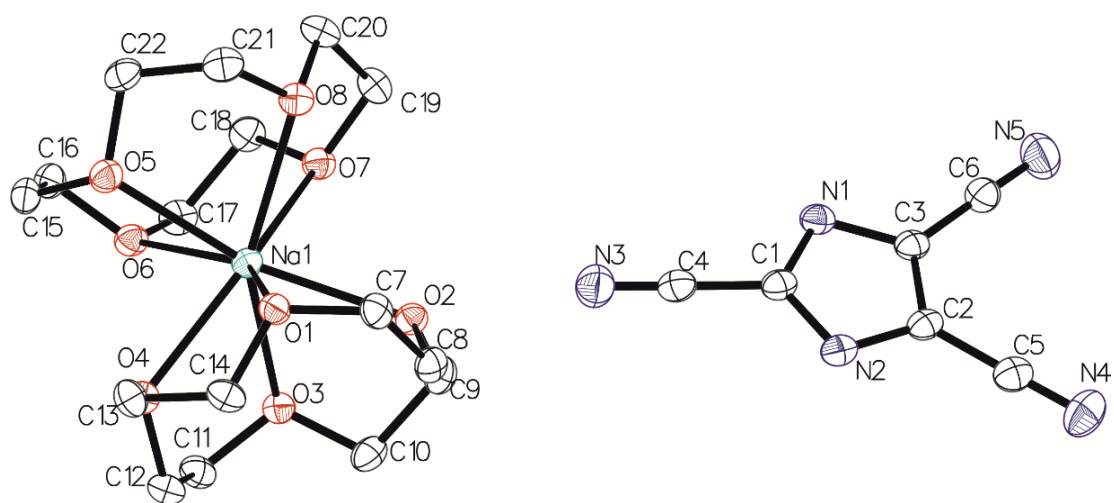

**Supporting figure 3.** Molecular structure of crystalline  $\text{Na}(\text{12C4})_2^+ \text{TIM}^-$  solvate. Hydrogen atoms were omitted for clarity.

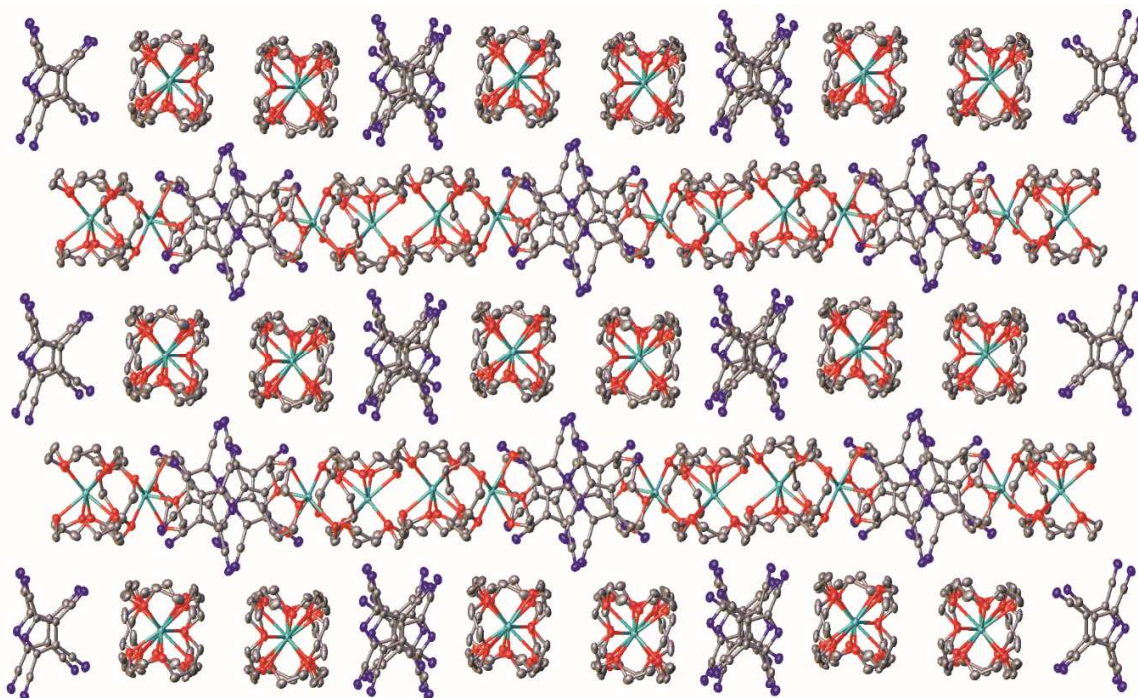

**Supporting figure 4.** Projection of the crystal packing in  $\text{Na}(\text{12C4})_2^+ \text{TCP}^-$  along  $a$  axis showing columnar arrangement of anions and cations. Hydrogen atoms have been omitted for clarity. Color code: gray C; red O; blue: N, cyan: Na.

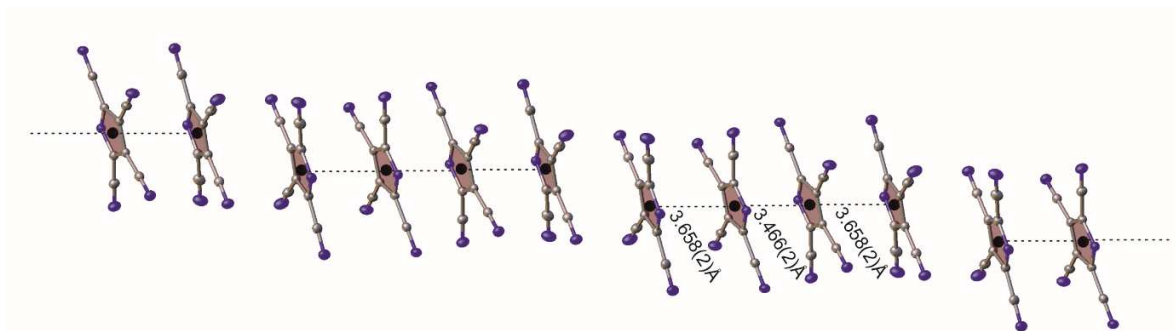

**Supporting figure 5.** Detailed view of columnar arrangement of anions in  $\text{Na}(\text{12C4})_2^+\text{TCP}^-$ . Tetrameric units are formed via  $\pi$ - $\pi$  stacking interaction between TCP rings with short centroid-centroid distance.

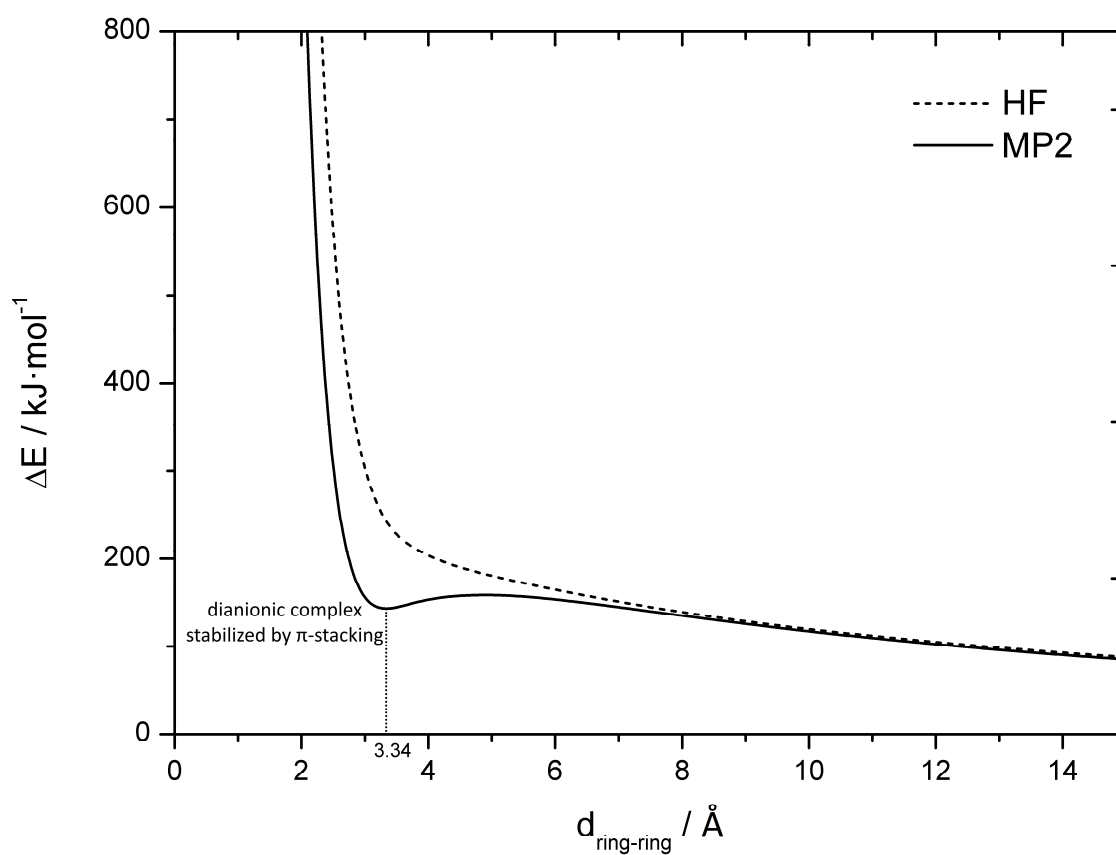

**Supporting figure 6.** BSSE-corrected interaction energies between two TCP anions, as a function of distance between the centers of rings; comparison of uncorrelated (HF/jun-cc-pVDZ) and correlated (MP2/jun-cc-pVDZ) methods in prediction of  $\pi$ -stacking interactions.

**Supporting table 2.** Detailed geometry of  $\pi$ - $\pi$  contacts in  $\text{Na}(\text{12C4})_2^+\text{TCP}^-$ .

| Plane                           | a-b      | b-c      | c-d      |
|---------------------------------|----------|----------|----------|
| Centroid-to-plane distance/Å    | 3.526(2) | 3.347(2) | 3.460(2) |
| Centroid-to-centroid distance/Å | 3.658(2) | 3.466(2) | 3.658(2) |
| Plane-to-plane angle /°         | 5.06(9)  | 0.0(2)   | 5.06(9)  |
| Shift displacement distance/Å   | 0.972(5) | 0.901(5) | 1.186(4) |

plane **a**: [C2 C1 C4 N1 C3]; plane **b**: [C26 C27 C28 N6 C25]; plane **c**: [C26 C27 C28 N6 C25]<sup>i</sup>, plane **d**: [C2 C1 C4 N1 C3]<sup>i</sup>; symmetry code  $i=1-x, 1-y, 2-z$ ;

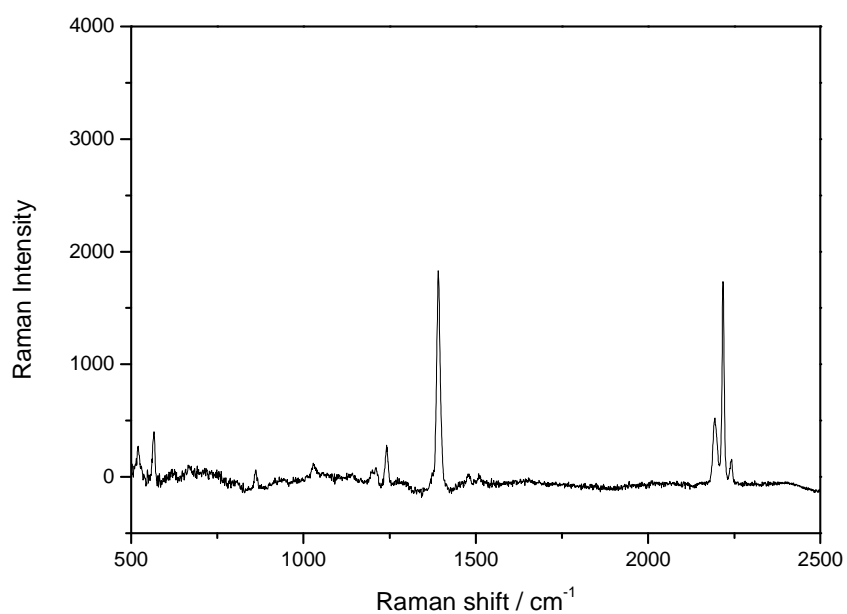

**Supporting figure 7.** PEO<sub>10</sub>PCPI Raman spectra.

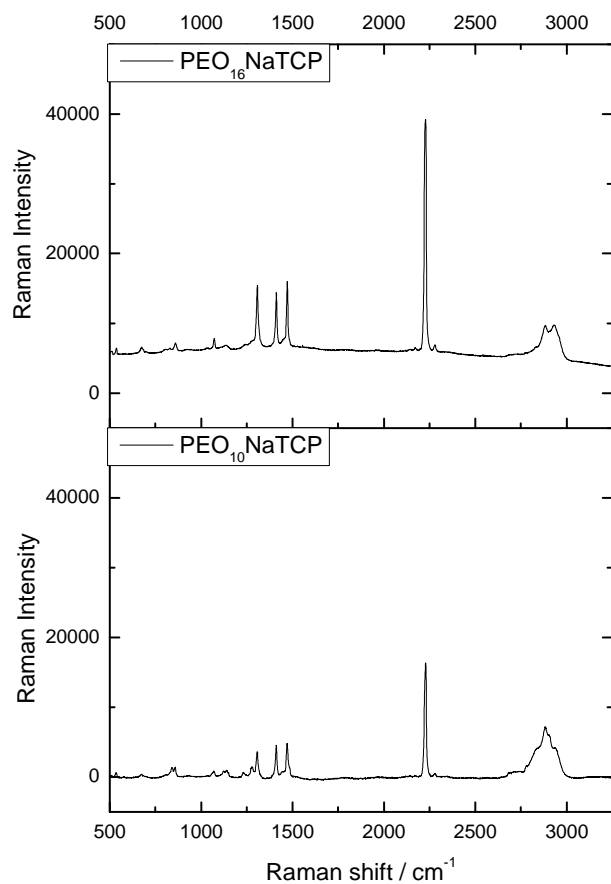

**Supporting figure 8.**  $\text{PEO}_{10}\text{NaTCP}$  and  $\text{PEO}_{16}\text{NaTCP}$  Raman spectra.

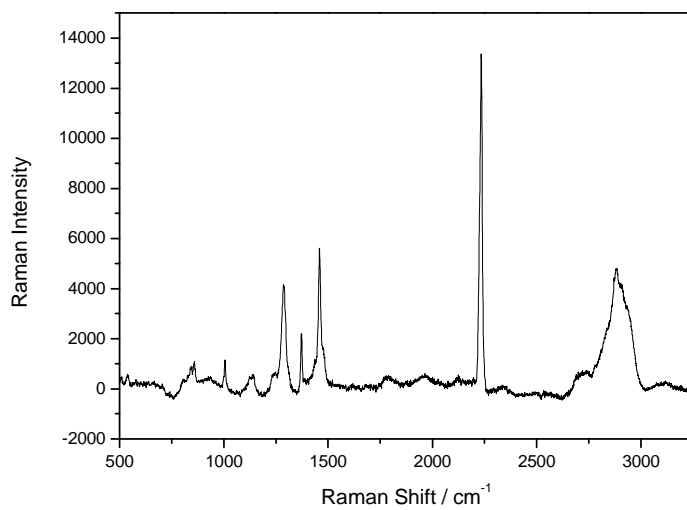

**Supporting figure 9.**  $\text{PEO}_{16}\text{NaTIM}$  Raman spectra.

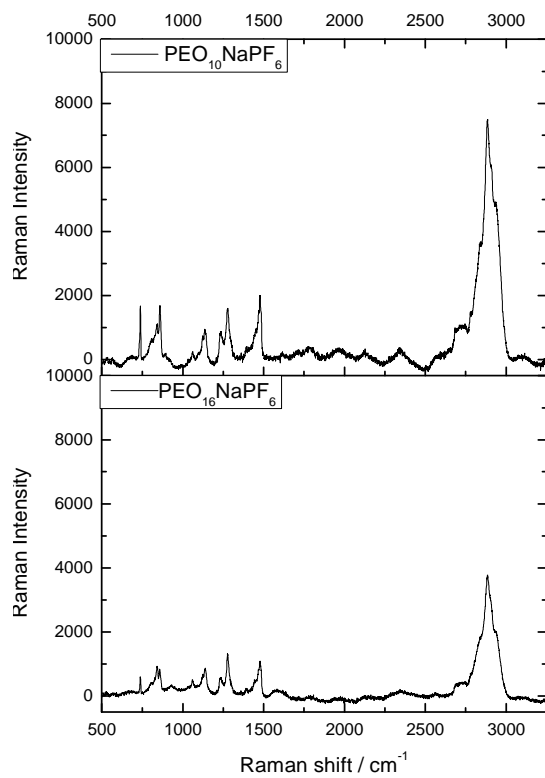

**Supporting figure 10.**  $\text{PEO}_{10}\text{NaPF}_6$  and  $\text{PEO}_{16}\text{NaPF}_6$  Raman spectra.



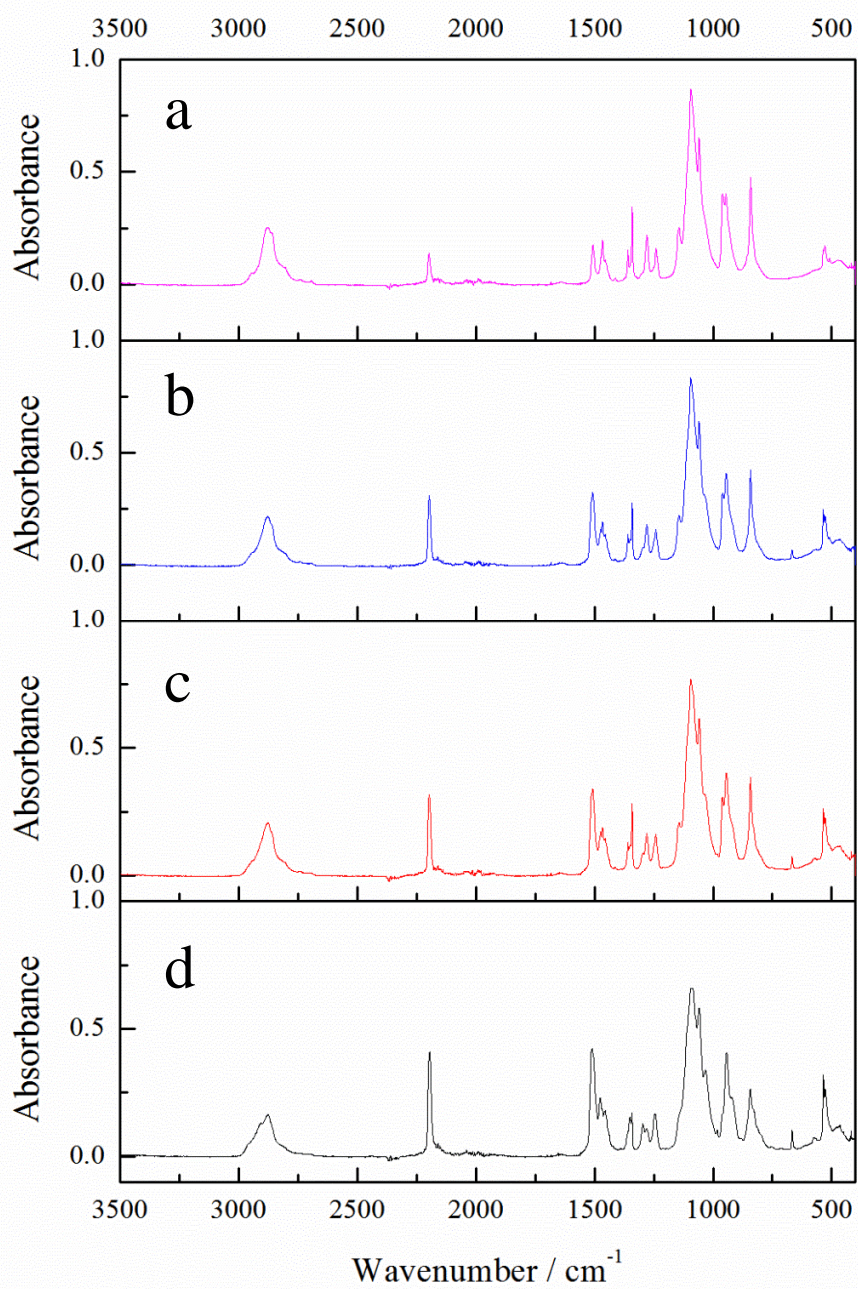

**Supporting figure 11.** FTIR spectra for PEO<sub>50</sub>NaPCPI (a), PEO<sub>20</sub>NaPCPI (b), PEO<sub>16</sub>NaPCPI (c) and PEO<sub>10</sub>NaPCPI (d).

**Supporting table 3.** Calculated dissociation energies of the most stable ion-pairs ( $\Delta E_d$ ) and anion oxidation potentials ( $\Delta E_v$ ).

| anion                        | $\Delta E_d$<br>[kJ·mol <sup>-1</sup> ]<br>B3LYP/6-<br>311+G(d) | $\Delta E_v$<br>[V vs. Na <sup>+</sup> /Na <sup>0</sup> ]<br>M06-2X/6-<br>311+G(d) |
|------------------------------|-----------------------------------------------------------------|------------------------------------------------------------------------------------|
| PCPI                         | 443                                                             | 3.25                                                                               |
| TIM                          | 420                                                             | 3.68                                                                               |
| TCP                          | 407                                                             | 3.89                                                                               |
| PF <sub>6</sub> <sup>-</sup> | 485                                                             | 7.02                                                                               |
| TFSI                         | 490                                                             | 5.45                                                                               |

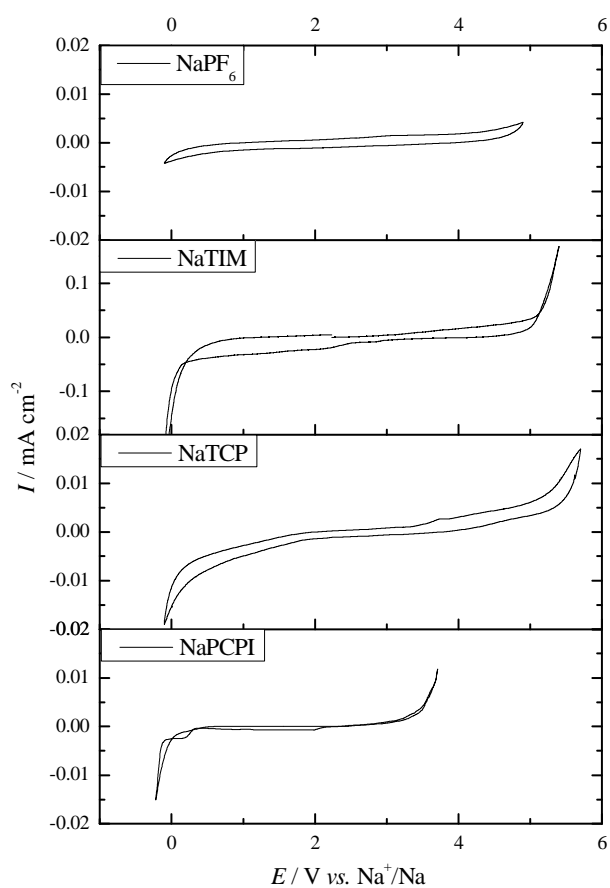

**Supporting figure 12.** Cyclic voltammetry of electrolytes (0.75 mol/kg of salts in PEG-500)

**Supporting table 4.** Ionic conductivity values of 0.75 mol kg<sup>-1</sup> of NaPF<sub>6</sub>, NaPCPI, NaTCP and NaTIM in PEG at various temperatures.

| Temperature, °C | $\sigma$ (NaPF <sub>6</sub> ), mS cm <sup>-1</sup> | $\sigma$ (NaPCPI), mS cm <sup>-1</sup> | $\sigma$ (NaTCP), mS cm <sup>-1</sup> | $\sigma$ (NaTIM), mS cm <sup>-1</sup> |
|-----------------|----------------------------------------------------|----------------------------------------|---------------------------------------|---------------------------------------|
| 10              | 0.35                                               | 0.48                                   | 0.66                                  | 0.77                                  |
| 20              | 0.57                                               | 0.75                                   | 1.05                                  | 1.16                                  |
| 25              | 0.71                                               | 0.94                                   | 1.24                                  | 1.36                                  |
| 30              | 0.84                                               | 1.14                                   | 1.52                                  | 1.57                                  |
| 40              | 1.17                                               | 1.56                                   | 2.16                                  | 2.18                                  |
| 50              | 1.56                                               | 2.09                                   | 2.90                                  | 2.83                                  |
| 60              | 1.98                                               | 2.67                                   | 3.77                                  | 3.53                                  |

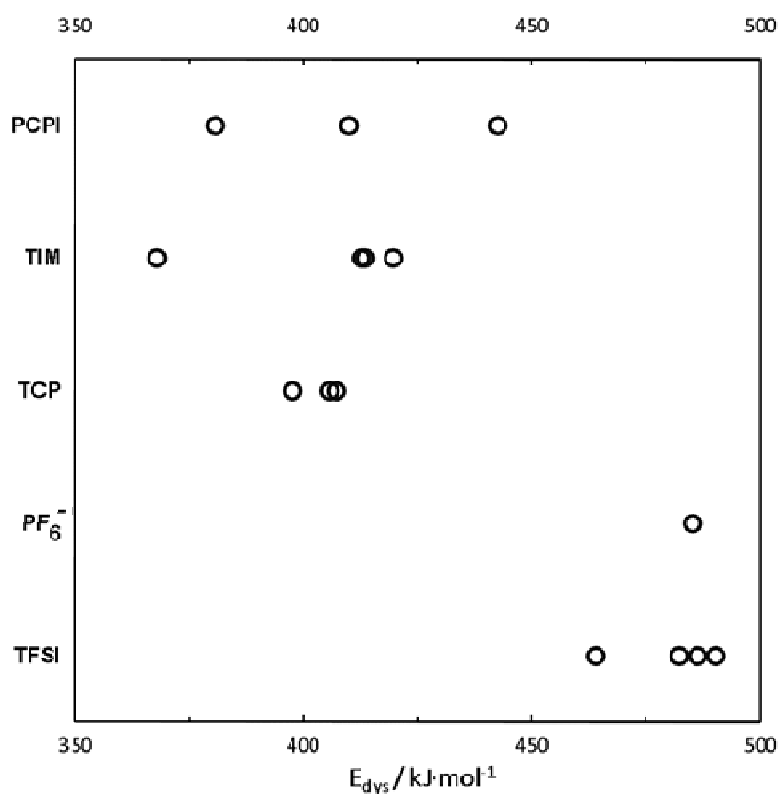

**Supporting figure 13.** Calculated dissociation energies for all found stable ion-pairs; B3LYP/6-311+G(d)

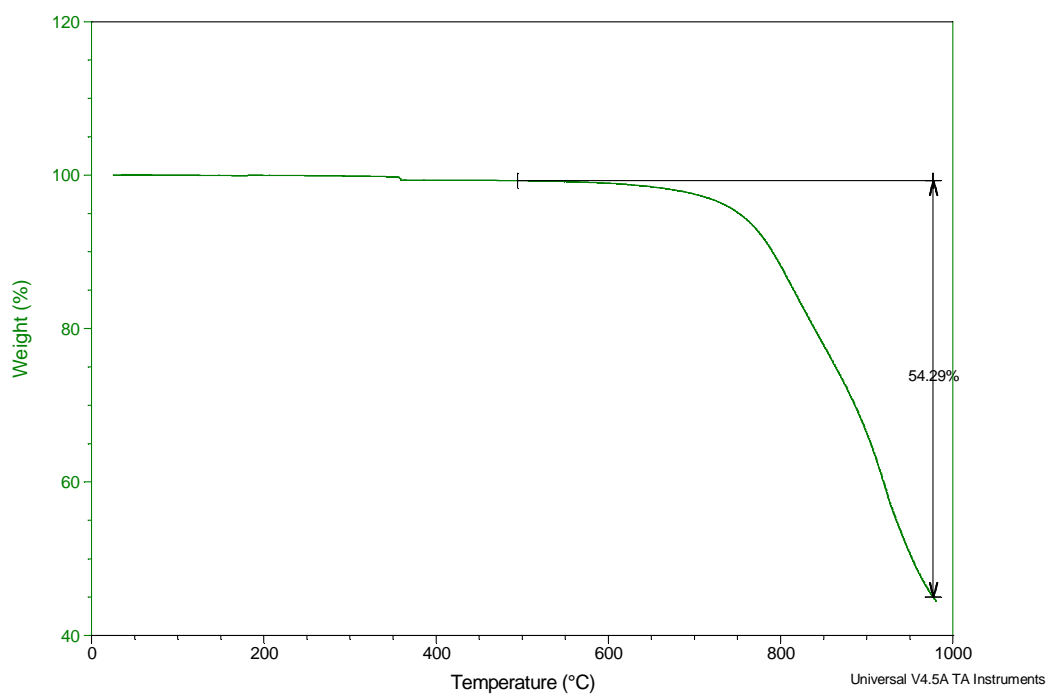

**Supporting figure 14.** TG of pure NaPCPI salt in inert atmosphere.

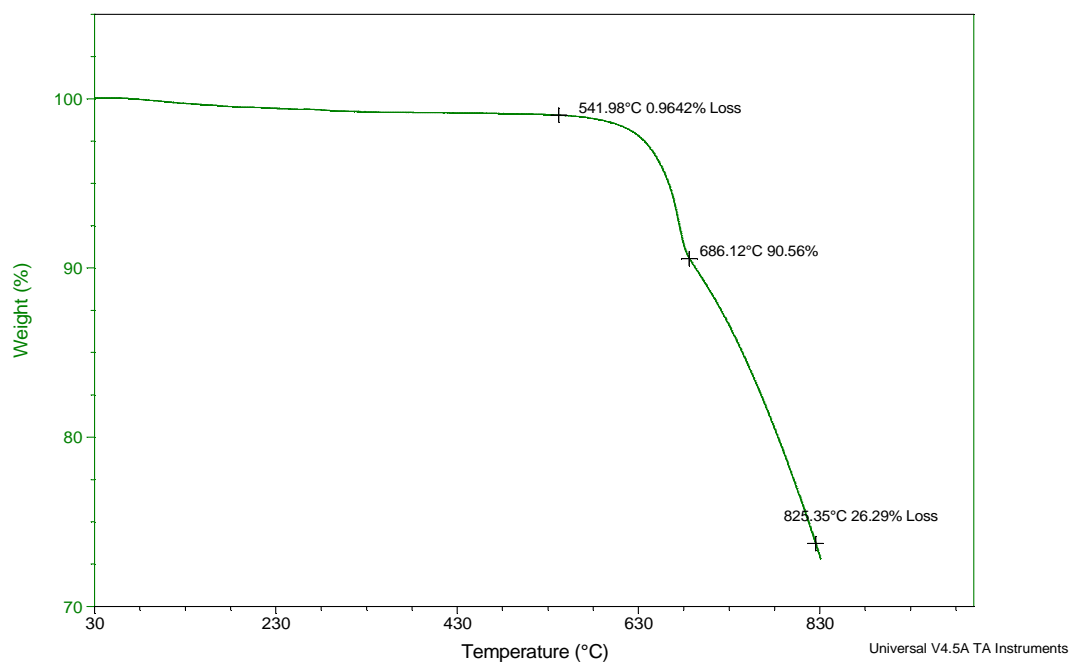

**Supporting figure 15.** TG of NaTCP heated at 10 °C/min in inert atmosphere.

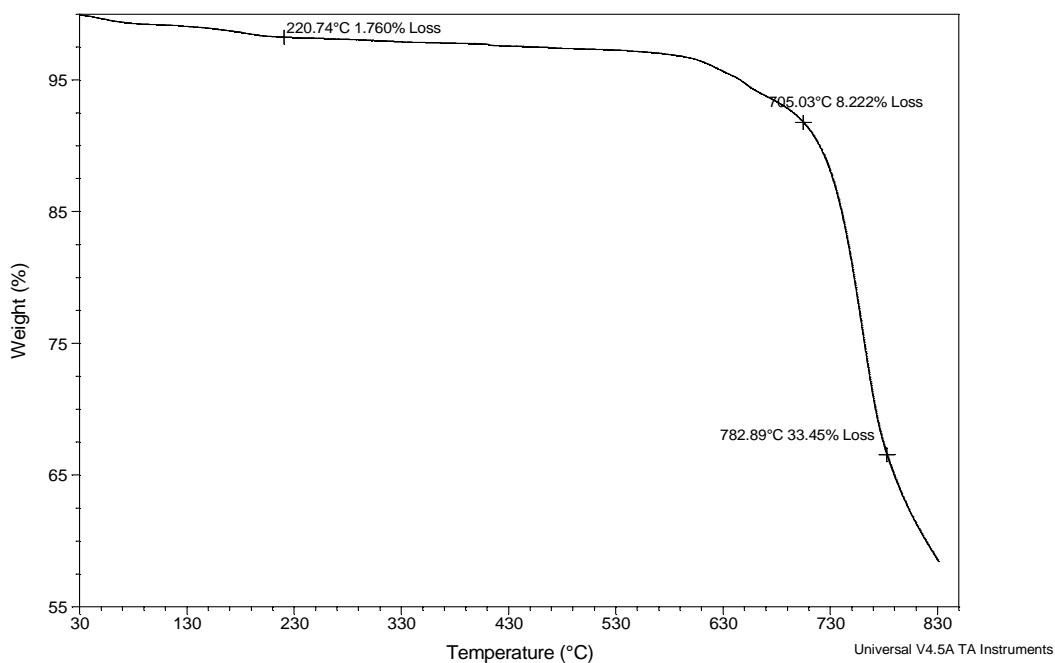

**Supporting figure 16.** TG of NaTIM heated at 10 °C/min in inert atmosphere.

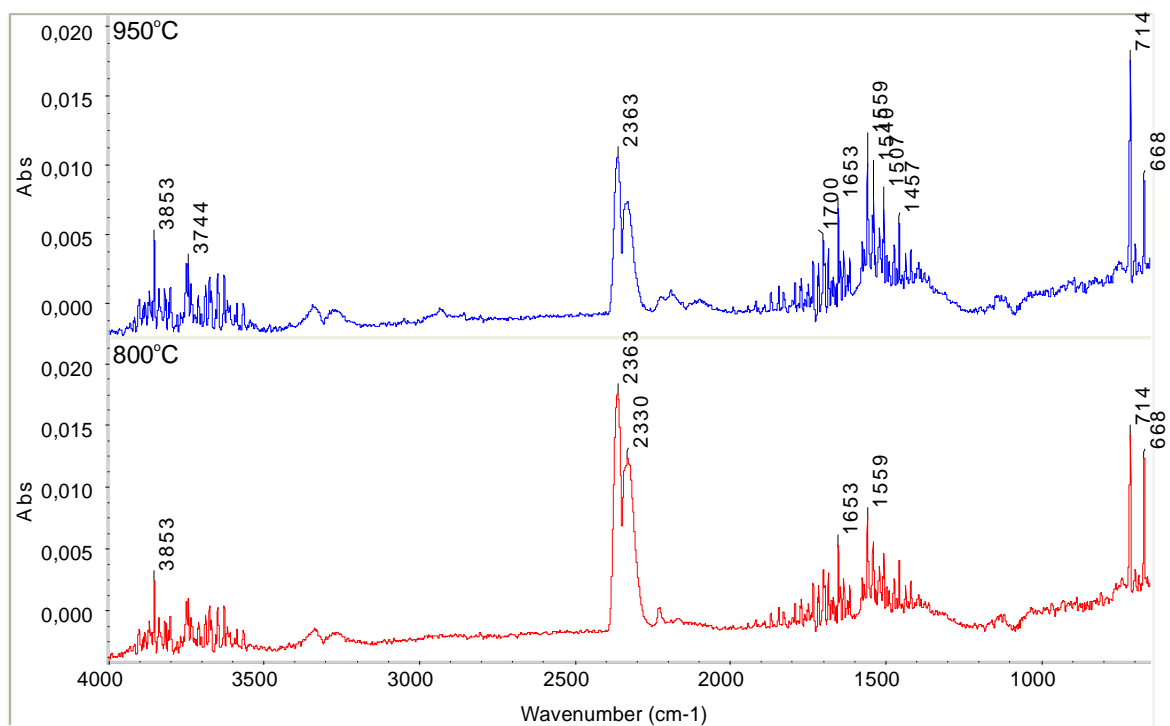

**Supporting figure 17.** FTIR spectra of NaPCPI at 800 °C (blue) and 950 °C (red).

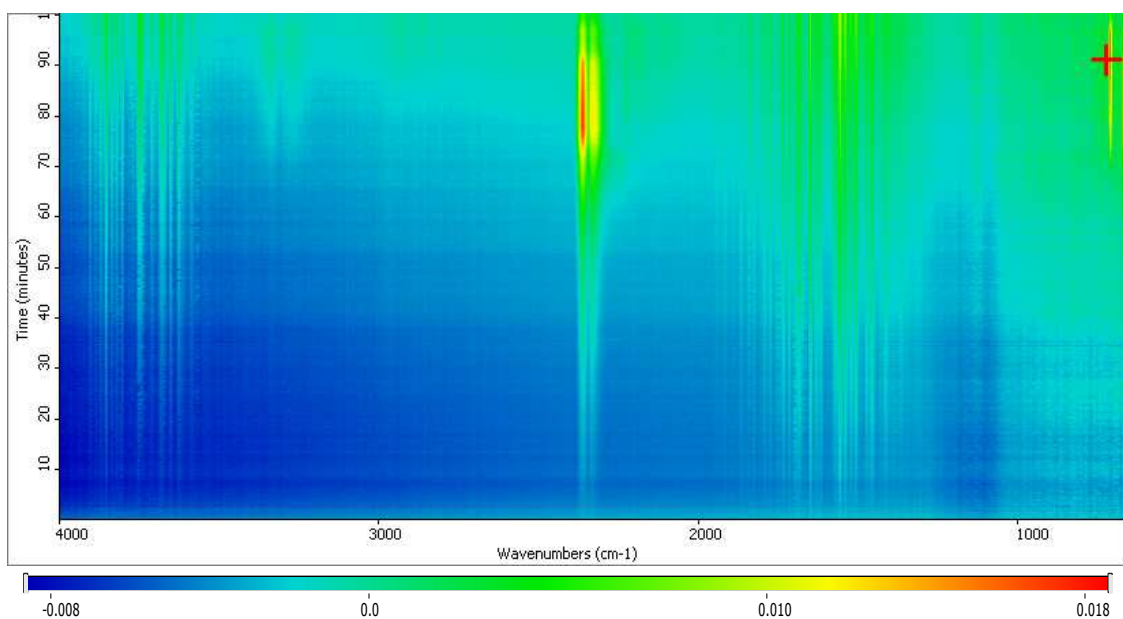

**Supporting figure 18.** FTIR spectra of evolved gases during TG of NaPCPI. The legend below the figure corresponds to peak intensity; where blue to red shift corresponds from negligible to intense peaks.

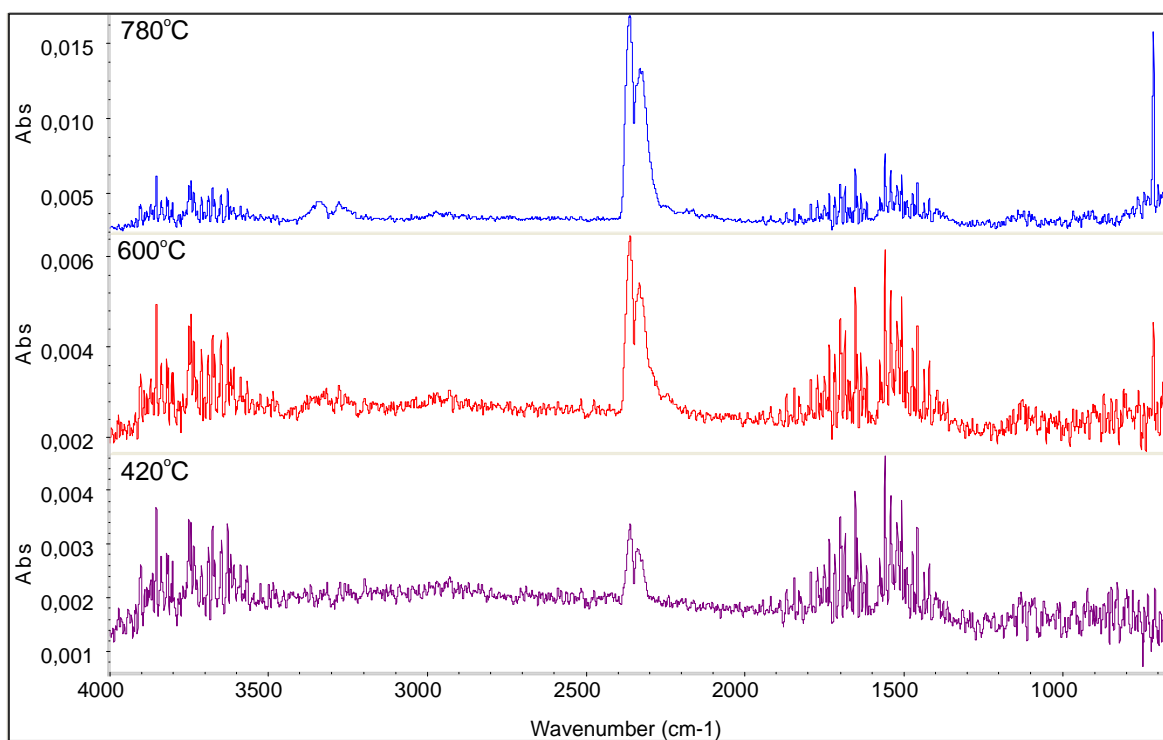

**Supporting figure 19.** FTIR spectra of evolved products of NaTCP at 420 (blue), 600 (red) and 780°C (purple).

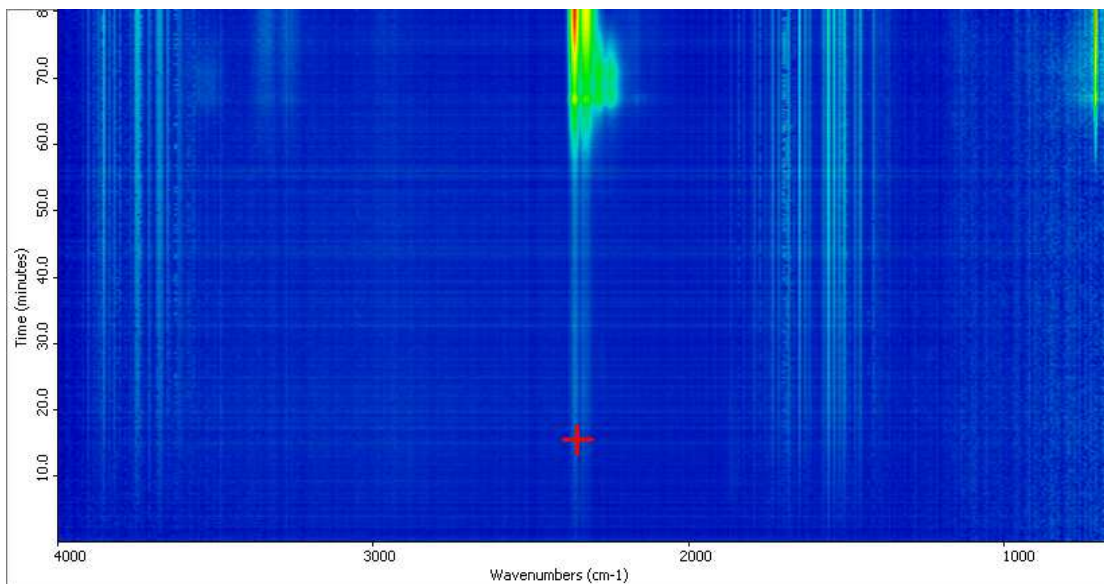

**Supporting figure 20.** FTIR spectra of evolved gases during TG of NaTCP. The legend below the figure corresponds to peak intensity; where blue to red shift corresponds from negligible to intense peaks.

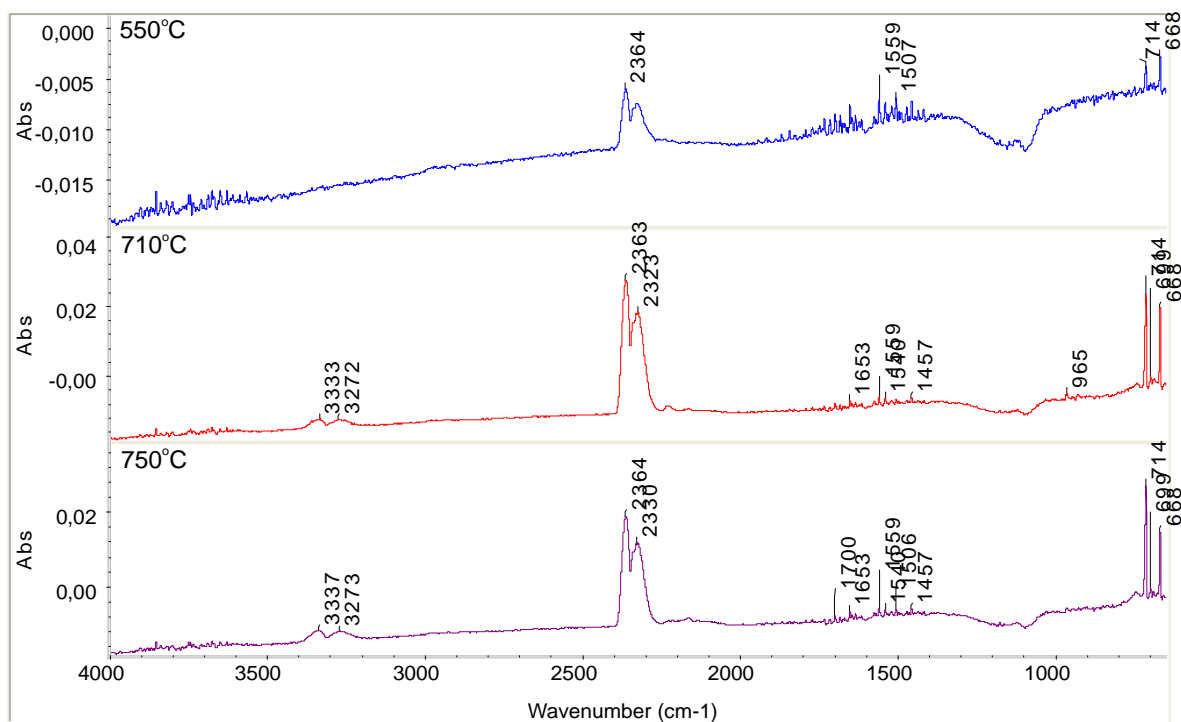

**Supporting figure 21.** FTIR of evolved gases during heating of NaTIM at 550 (blue), 710 (purple) and 750 (red) °C.

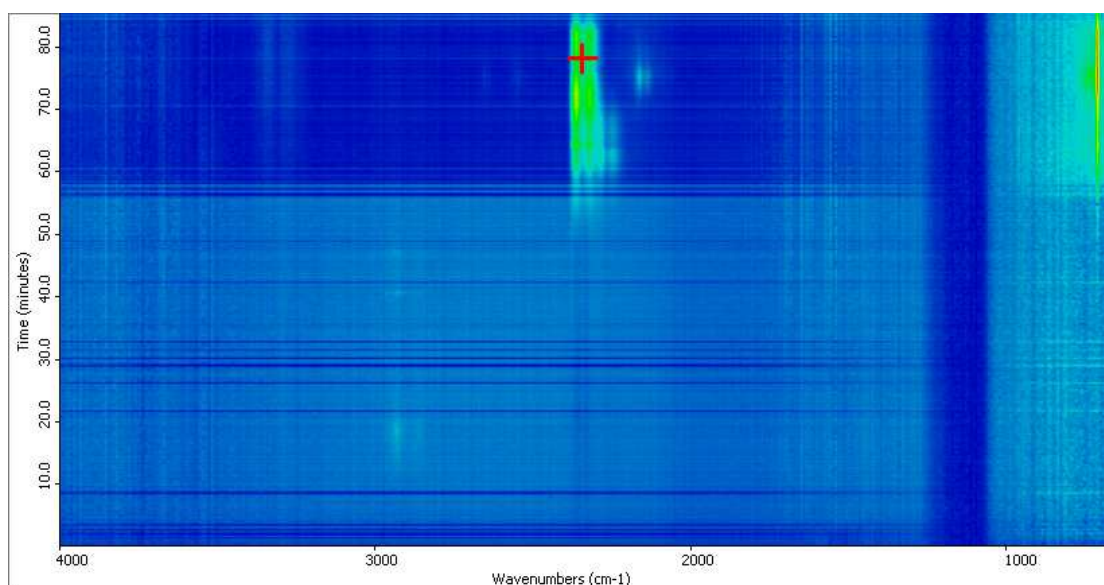

**Supporting figure 22.** FTIR spectra of evolved gases during TG of NaTCP. The legend below the figure corresponds to peak intensity; where blue to red shift corresponds from negligible to intense peaks.

**Supporting table 5.** Composition (polymer:salt molar ratio), glass transition temperature ( $T_g$ ), melting temperature ( $T_m$ ), for solid-polymer electrolytes undergoing DSC. PEO<sub>10</sub>NaTIM was not studied due to way different morphology then other presented polymer electrolytes.

|                      |                                         |                                         |                                         |                                         |
|----------------------|-----------------------------------------|-----------------------------------------|-----------------------------------------|-----------------------------------------|
| <b>concentration</b> | <b>PEO<sub>10</sub>NaPCPI</b>           | <b>PEO<sub>16</sub>NaPCPI</b>           | <b>PEO<sub>20</sub>NaPCPI</b>           | <b>PEO<sub>50</sub>NaPCPI</b>           |
| $T_g/^\circ\text{C}$ | -39.8                                   | -36.1                                   | -35.5                                   | -38.0                                   |
| $T_m/^\circ\text{C}$ | 47.1                                    | 51.0                                    | 50.6                                    | 62.1                                    |
| <b>concentration</b> | <b>PEO<sub>10</sub>NaTCP</b>            | <b>PEO<sub>16</sub>NaTCP</b>            | <b>PEO<sub>20</sub>NaTCP</b>            | <b>PEO<sub>50</sub>NaTCP</b>            |
| $T_g/^\circ\text{C}$ | -33.8                                   | -30.7                                   | -30.4                                   | -39.5                                   |
| $T_m/^\circ\text{C}$ | 47.4                                    | 52.1                                    | 55.9                                    | 61.7                                    |
| <b>concentration</b> | <b>PEO<sub>10</sub>NaTIM*</b>           | <b>PEO<sub>16</sub>NaTIM</b>            | <b>PEO<sub>20</sub>NaTIM</b>            | <b>PEO<sub>50</sub>NaTIM</b>            |
| $T_g/^\circ\text{C}$ | -                                       | -37.8                                   | -37.7                                   | -44.8                                   |
| $T_m/^\circ\text{C}$ | -                                       | 49.2                                    | 54.0                                    | 61.0                                    |
| <b>concentration</b> | <b>PEO<sub>10</sub>NaPF<sub>6</sub></b> | <b>PEO<sub>16</sub>NaPF<sub>6</sub></b> | <b>PEO<sub>20</sub>NaPF<sub>6</sub></b> | <b>PEO<sub>50</sub>NaPF<sub>6</sub></b> |
| $T_g/^\circ\text{C}$ | -27.6                                   | -29.4                                   | -39.7                                   | -53.1                                   |
| $T_m/^\circ\text{C}$ | 53.9                                    | 57.3                                    | 69.9                                    | 66.5                                    |



a) NaTIM

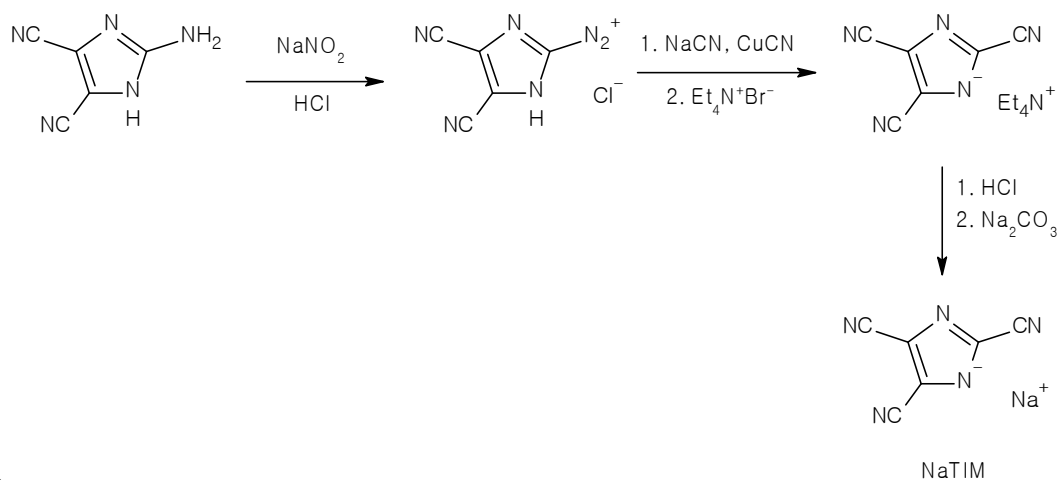

b) NaTCP

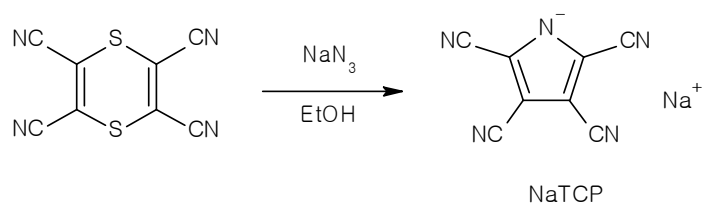

c) NaPCPI

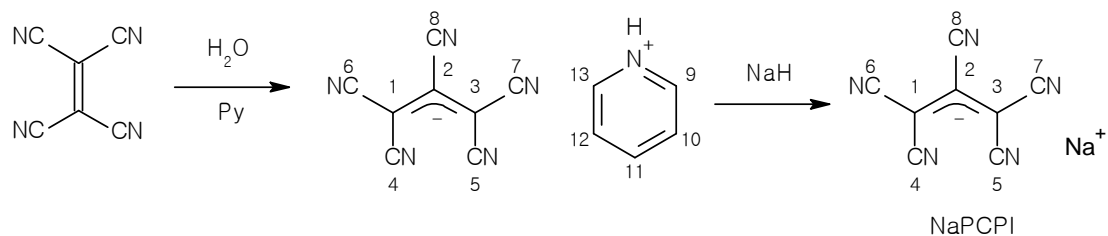

**Supporting figure 23.** Synthesis scheme a) NaTIM, b) NaTCP, c) NaPCPI

**References**

- [1] CRYSTALIS<sup>PRO</sup> Software system, Agilent Technologies, Oxford, UK, 2014
- [2] Dolomanov, O.V., Bourhis, L.J., Gildea, R.J, Howard, J.A.K. & Puschmann, H. (2009), *J. Appl. Cryst.* 42, 339-341
- [3] Sheldrick, G.M. (2015). *Acta Cryst.* A71, 3-8
- [4] Sheldrick, G.M. (2008). *Acta Cryst.* A64, 112-122
